# Supplementary material
Source: PubMed Central journal article supplement (PMC2876975)
Supplement: NIHMS192194-supplement-Supplemental_Table.pdf [file NIHMS192194-supplement-Supplemental_Table.pdf]

**Supplementary Table S1.** Primers used for plasmid construction

| Primer             | F/R | Sequence (5'→3')                    | Restriction site* |
|--------------------|-----|-------------------------------------|-------------------|
| TN/96-12 HMPV N    | F   | GgaattcATTATGTCTCTTCAAGGGATTCACCTG  | <i>EcoRI</i>      |
|                    | R   | CGggatccTTACTCATAATCATTTTGACTGTCGTC | <i>BamHI</i>      |
| TN/96-12 HMPV P    | F   | GgaattcATTATGTCATTCCCTGAAGGAAAAGAT  | <i>EcoRI</i>      |
|                    | R   | gtcgacCTACATAATTAAGTGGTAAATGTCATC   | <i>Sall</i>       |
| TN/96-12 HMPV M    | F   | GgaattcATTATGGAGTCCTACCTAGTAGACACC  | <i>EcoRI</i>      |
|                    | R   | CGggatccTTATCTGGACTTCAACACATATCTTGT | <i>BamHI</i>      |
| TN/96-12 HMPV M2-1 | F   | GgaattcATTATGTCTCGCAAGGCTCCATGCAA   | <i>EcoRI</i>      |
|                    | R   | CGggatccTCACTGCACTTGATTAGTGCTTTCCT  | <i>EcoRI</i>      |
| TN/96-12 HMPV M2-2 | F   | GgaattcATTATGACTCTTTATATGCCTTGCAAG  | <i>EcoRI</i>      |
|                    | R   | CGggatccCTAACTTAAGTAAGCCTTGACATATAT | <i>BamHI</i>      |
| HMPV N1 Y2H bait   | F   | gaattcATTATGTCTCTTCAAGGG            | <i>EcoRI</i>      |
|                    | R   | ggatccTTAATCCCTTTTTATTGTGTACTGAG    | <i>BamHI</i>      |
| HMPV N2 Y2H bait   | F   | gaattcATTATGTCTCTTCAAGGG            | <i>EcoRI</i>      |
|                    | R   | ggatccTTAGATTATGGGTGTGTCTGGTGC      | <i>BamHI</i>      |
| HMPV N3 Y2H bait   | F   | gaattcATTATGTCTCTTCAAGGG            | <i>EcoRI</i>      |
|                    | R   | ggatccTTATTGCATGAATATATTAACAAATAG   | <i>BamHI</i>      |
| HMPV N4 Y2H bait   | F   | gaattcATTATGTCTCTTCAAGGG            | <i>EcoRI</i>      |
|                    | R   | ggatccTTAGGATACATGTCCTAACATTATA     | <i>BamHI</i>      |
| HMPV N5 Y2H bait   | F   | gaattcATTATGTCTCTTCAAGGG            | <i>EcoRI</i>      |
|                    | R   | ggatccTTACCCACGATACATACCG           | <i>BamHI</i>      |
| HMPV N6 Y2H bait   | F   | gaattcATTATGTCTCTTCAAGGG            | <i>EcoRI</i>      |
|                    | R   | ggatccTTAATTTAAGAAATGTTCTGCAG       | <i>BamHI</i>      |
| HMPV N7 Y2H bait   | F   | gaattcATTATGGTGGGTACAACAAGTGCAGTG   | <i>EcoRI</i>      |
|                    | R   | ggatccTTACTCATAATCATTTTGAC          | <i>BamHI</i>      |

|                      |   |                                    |              |
|----------------------|---|------------------------------------|--------------|
| HMPV N8 Y2H bait     | F | gaattcATTATGTTATTATGTGTAGGTGCCTTA  | <i>EcoRI</i> |
|                      | R | ggatccTTACTCATAATCATTTTGAC         | <i>BamHI</i> |
| HMPV N9 Y2H bait     | F | gaattcATTATGGCTTATGGAGCCGGTCAAAC   | <i>EcoRI</i> |
|                      | R | ggatccTTACTCATAATCATTTTGAC         | <i>BamHI</i> |
| HMPV N10 Y2H<br>bait | F | gaattcATTATGGTCCAAGCTGAGTTAAAACAGG | <i>EcoRI</i> |
|                      | R | ggatccTTACTCATAATCATTTTGAC         | <i>BamHI</i> |
| HMPV N11 Y2H<br>bait | F | gaattcATTATGAGAGTACCAAACACAGAATTA  | <i>EcoRI</i> |
|                      | R | ggatccTTACTCATAATCATTTTGAC         | <i>BamHI</i> |
| HMPV N12 Y2H<br>bait | F | gaattcATTATGGTGAGTGACGACAGTCAA     | <i>EcoRI</i> |
|                      | R | ggatccTTACTCATAATCATTTTGAC         | <i>BamHI</i> |

\*Shown in lower case.

F, Forward; R, reverse.

---

**Derdowski, A., Peters, T. R., Glover, N., Qian, R., Utley, T. J., Burnett, A., Williams, J. V., Spearman, P. and Crowe, J. E. (2008).** Human metapneumovirus nucleoprotein and phosphoprotein interact and provide the minimal requirements for inclusion body formation. *J Gen Virol* **89**, 2698–2708.
